# Supplementary material
Source: publisher figshare collection journal article supplement (https://karger.figshare.com/ndownloader/files/15017717)
Supplement: Supplementary file 1 [file 15017717]

Table S1:Number of activated voxels in human and Ateles monkey networks.

| Network | Human (Num. Voxels) | Ateles (Num. Voxels) | Human (mm3) | Ateles (mm3) | Human (% of Brain) | Ateles (% of Brain) |
| --- | --- | --- | --- | --- | --- | --- |
| Default 1 | 6,670 | 1,174 | 53,360 | 9,392 | 3.38 | 3.72 |
| Default 2 | 7,444 | 958 | 59,552 | 7,664 | 3.77 | 3.04 |
| Visual | 4,179 | 886 | 33,432 | 7,088 | 2.12 | 2.81 |
| Auditory | 4,579 | 789 | 36,632 | 6,312 | 2.32 | 2.50 |
| Right Memory | 6,869 | 636 | 54,952 | 5,088 | 3.48 | 2.02 |
| Exastriate | 7,386 | 845 | 59,088 | 6,760 | 3.74 | 2.68 |
| Motor | 6,129 | 893 | 49,032 | 7144 | 3.11 | 2.83 |
| Executive Control | 5,276 | 766 | 42,208 | 61,28 | 2.67 | 2.43 |
| Working Memory | 5,276 | 804 | 42,208 | 6,432 | 2.67 | 2.55 |
| Total Brain | 197,293 | 31,536 | 1,578,344 | 252,288 | 100.00 | 100.00 |
